# Supplementary material for: All inkjet-printed piezoelectric electronic devices: energy generators, sensors and actuators
Source: Royal Society of Chemistry journal article supplement (doi:10.1039/c7tc02558k), 2017-01-01
Supplement: c7tc02558k1.pdf [file c7tc02558k1.pdf]

## Journal of Material Chemistry C

### SUPPORTING INFORMATION

#### All Inkjet-Printed Piezoelectric Electronic Devices: Energy generator, Sensors and Actuators

Damien Thuau<sup>a\*</sup>, Konstantinos Kallitsis<sup>a</sup>, Fabrice Domingues Dos Santos<sup>b</sup> and Georges Hadziioannou<sup>a</sup>

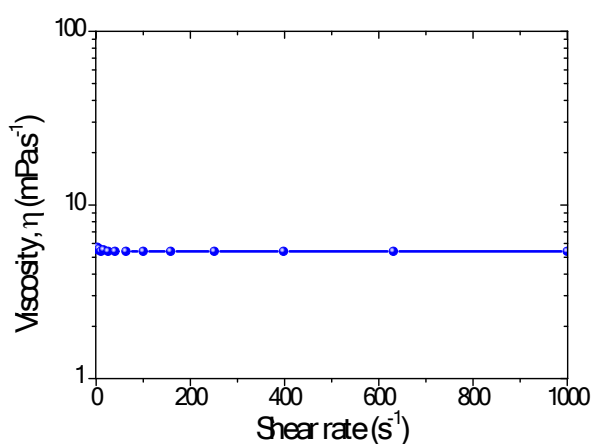

Supporting information 1. Viscosity of the formulated P(VDF-TrFE) based ink for inkjet printing

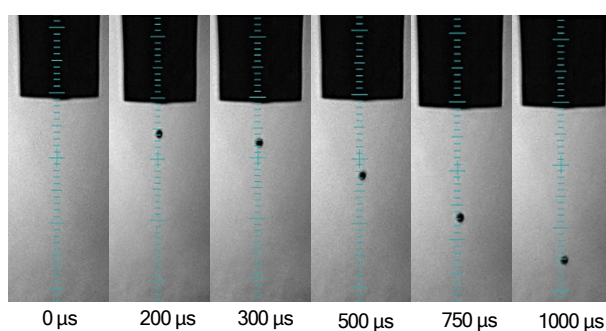

Supporting information 2. Fast speed image showing the excellent jetting of P(VDF-TrFE) ink without the presence of satellite nor tails on the inkjet drop

<sup>a</sup> Laboratoire de Chimie des Polymères Organiques, ENSCPB, Université de Bordeaux, 16 Avenue Pey-Berland, F-33607 Cedex Pessac, France

<sup>b</sup> Piezotech S.A.S., Arkema-CRRA, Rue Henri-Moissan, 69493 Pierre-Benite Cedex, France \*Email : damien.thuau@enscpb.fr

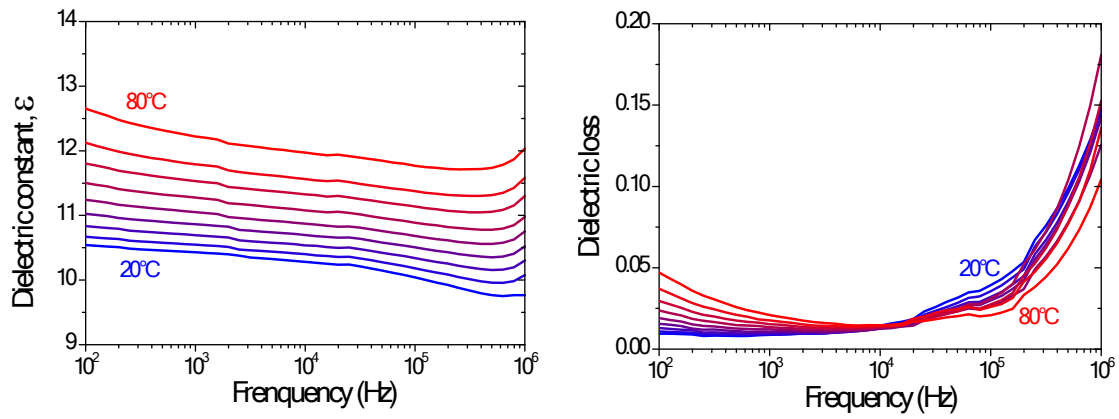

Supporting information 3. Relative permittivity and dielectric loss of inkjet-printed P(VDF-TrFE) layer as a function of frequency for different temperatures ranging from 20°C to 80°C

Supporting information 4. Video showing the generated output voltage from the piezoelectric generators under applied finger pressure

|                           | Substrate (PEN) | Piezoelectric P(VDF-TrFE) | Electrodes (Ag) |
|---------------------------|-----------------|---------------------------|-----------------|
| Young's modulus, E (GPa)  | 4               | 2                         | 40              |
| Thickness, t (μm)         | 50              | 2.0 ± 0.1                 | 1.60 ± 0.05     |
| Cantilever length, L (mm) | 7.0 ± 0.2       |                           |                 |
| Cantilever width, b (mm)  | 3.0 ± 0.2       |                           |                 |

Supporting information 5. Material parameters used for modeling of actuator behavior
